# Supplementary material for: HAPPi Kneecaps! Protocol for a participant‐ and assessor‐blinded, randomised, parallel group feasibility trial of foot orthoses for adolescents with patellofemoral pain
Source: Springer Nature journal article supplement (doi:10.1186/s13047-020-00417-9), 2020-01-01

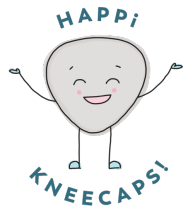

# HAPPi Kneecaps! Daily diary

Name: \_\_\_\_\_

Participant ID: \_\_\_\_\_

## KNEE PAIN SCALE:

Please use the scale below to rate your knee pain is each day, and record it in the tables on the following pages. The faces and descriptions will help you to rate your pain each day. For example, 0 means that you have no pain, while 10 means that your knee hurts the worst that you could imagine. A pain rating of 5 indicates a moderate amount of pain.

### PAIN MEASUREMENT SCALE

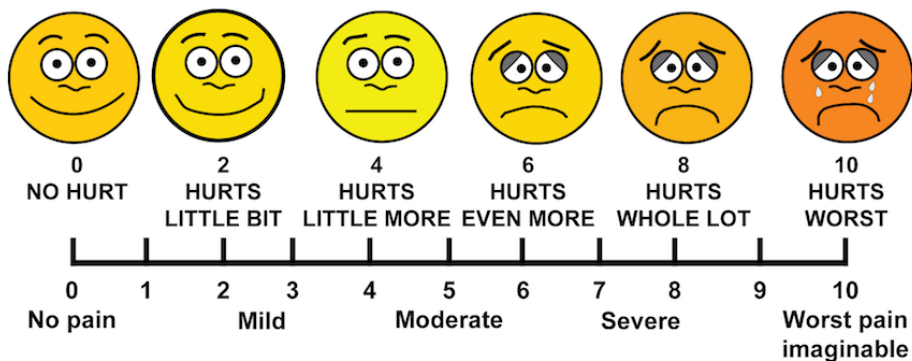

If you have any questions about HAPPi Kneecaps!, please contact:

Isobel O'Sullivan

PhD Candidate, School of Health and Rehabilitation Sciences

The University of Queensland

Email: [isobel.osullivan@uq.edu.au](mailto:isobel.osullivan@uq.edu.au)

## FOOTWEAR TYPES:

Please use the descriptions below to record which shoes you wore each day. If your shoes don't match any of the options below, you can provide a brief description instead.

Walking shoe

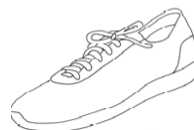

Athletic shoe /  
Runner

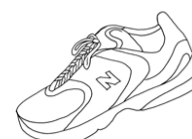

Oxford shoe

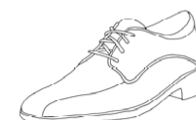

Moccasin

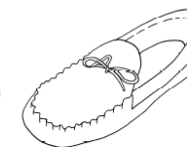

Boot

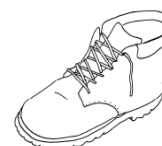

Ugg boot

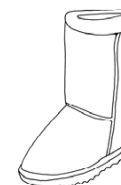

High heel /  
Stiletto

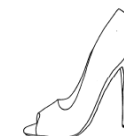

Thong / Flip flop

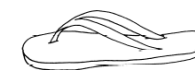

Slipper

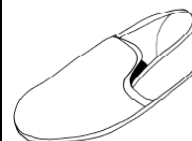

Sandal

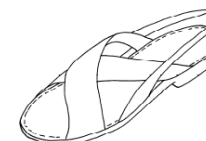

Court shoe

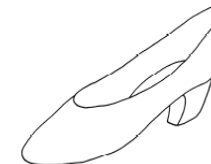

Mule

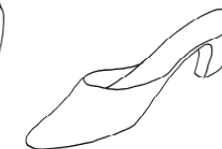

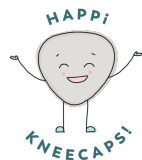

## WEEK 1!

Please write Monday's date here: \_\_\_\_\_

Please record the following information each day over the week.

| Daily Record                                                                                                             | Monday | Tuesday | Wednesday | Thursday | Friday | Saturday | Sunday |
|--------------------------------------------------------------------------------------------------------------------------|--------|---------|-----------|----------|--------|----------|--------|
| What activities or sport did you do today?                                                                               |        |         |           |          |        |          |        |
| How was your knee pain today on a scale of 0-10?                                                                         |        |         |           |          |        |          |        |
| What type of shoes did you wear today? Please look at the examples on page 1.                                            |        |         |           |          |        |          |        |
| How many hours did you wear your shoe inserts today?                                                                     |        |         |           |          |        |          |        |
| Did you have any problems with your shoe inserts today?                                                                  |        |         |           |          |        |          |        |
| Did you take any medication for your knee pain today?<br>If yes, please write down what you took (e.g. Panadol, Nurofen) |        |         |           |          |        |          |        |
| Is there anything else you'd like to tell us about today?                                                                |        |         |           |          |        |          |        |

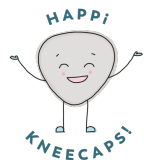

## WEEK 2!

Please write Monday's date here: \_\_\_\_\_

Please record the following information each day over the week.

| Daily Record                                                                                                             | Monday | Tuesday | Wednesday | Thursday | Friday | Saturday | Sunday |
|--------------------------------------------------------------------------------------------------------------------------|--------|---------|-----------|----------|--------|----------|--------|
| What activities or sport did you do today?                                                                               |        |         |           |          |        |          |        |
| How was your knee pain today on a scale of 0-10?                                                                         |        |         |           |          |        |          |        |
| What type of shoes did you wear today? Please look at the examples on page 1.                                            |        |         |           |          |        |          |        |
| How many hours did you wear your shoe inserts today?                                                                     |        |         |           |          |        |          |        |
| Did you have any problems with your shoe inserts today?                                                                  |        |         |           |          |        |          |        |
| Did you take any medication for your knee pain today?<br>If yes, please write down what you took (e.g. Panadol, Nurofen) |        |         |           |          |        |          |        |
| Is there anything else you'd like to tell us about today?                                                                |        |         |           |          |        |          |        |



### WEEK 3!

Please write Monday's date here: \_\_\_\_\_

Please record the following information each day over the week.

| Daily Record                                                                                                             | Monday | Tuesday | Wednesday | Thursday | Friday | Saturday | Sunday |
|--------------------------------------------------------------------------------------------------------------------------|--------|---------|-----------|----------|--------|----------|--------|
| What activities or sport did you do today?                                                                               |        |         |           |          |        |          |        |
| How was your knee pain today on a scale of 0-10?                                                                         |        |         |           |          |        |          |        |
| What type of shoes did you wear today? Please look at the examples on page 1.                                            |        |         |           |          |        |          |        |
| How many hours did you wear your shoe inserts today?                                                                     |        |         |           |          |        |          |        |
| Did you have any problems with your shoe inserts today?                                                                  |        |         |           |          |        |          |        |
| Did you take any medication for your knee pain today?<br>If yes, please write down what you took (e.g. Panadol, Nurofen) |        |         |           |          |        |          |        |
| Is there anything else you'd like to tell us about today?                                                                |        |         |           |          |        |          |        |



## WEEK 4!

Please write Monday's date here: \_\_\_\_\_

Please record the following information each day over the week.

| Daily Record                                                                                                             | Monday | Tuesday | Wednesday | Thursday | Friday | Saturday | Sunday |
|--------------------------------------------------------------------------------------------------------------------------|--------|---------|-----------|----------|--------|----------|--------|
| What activities or sport did you do today?                                                                               |        |         |           |          |        |          |        |
| How was your knee pain today on a scale of 0-10?                                                                         |        |         |           |          |        |          |        |
| What type of shoes did you wear today? Please look at the examples on page 1.                                            |        |         |           |          |        |          |        |
| How many hours did you wear your shoe inserts today?                                                                     |        |         |           |          |        |          |        |
| Did you have any problems with your shoe inserts today?                                                                  |        |         |           |          |        |          |        |
| Did you take any medication for your knee pain today?<br>If yes, please write down what you took (e.g. Panadol, Nurofen) |        |         |           |          |        |          |        |
| Is there anything else you'd like to tell us about today?                                                                |        |         |           |          |        |          |        |



## WEEK 5!

Please write Monday's date here: \_\_\_\_\_

Please record the following information each day over the week.

| Daily Record                                                                                                             | Monday | Tuesday | Wednesday | Thursday | Friday | Saturday | Sunday |
|--------------------------------------------------------------------------------------------------------------------------|--------|---------|-----------|----------|--------|----------|--------|
| What activities or sport did you do today?                                                                               |        |         |           |          |        |          |        |
| How was your knee pain today on a scale of 0-10?                                                                         |        |         |           |          |        |          |        |
| What type of shoes did you wear today? Please look at the examples on page 1.                                            |        |         |           |          |        |          |        |
| How many hours did you wear your shoe inserts today?                                                                     |        |         |           |          |        |          |        |
| Did you have any problems with your shoe inserts today?                                                                  |        |         |           |          |        |          |        |
| Did you take any medication for your knee pain today?<br>If yes, please write down what you took (e.g. Panadol, Nurofen) |        |         |           |          |        |          |        |
| Is there anything else you'd like to tell us about today?                                                                |        |         |           |          |        |          |        |



## WEEK 6!

Please write Monday's date here: \_\_\_\_\_

Please record the following information each day over the week.

| Daily Record                                                                                                             | Monday | Tuesday | Wednesday | Thursday | Friday | Saturday | Sunday |
|--------------------------------------------------------------------------------------------------------------------------|--------|---------|-----------|----------|--------|----------|--------|
| What activities or sport did you do today?                                                                               |        |         |           |          |        |          |        |
| How was your knee pain today on a scale of 0-10?                                                                         |        |         |           |          |        |          |        |
| What type of shoes did you wear today? Please look at the examples on page 1.                                            |        |         |           |          |        |          |        |
| How many hours did you wear your shoe inserts today?                                                                     |        |         |           |          |        |          |        |
| Did you have any problems with your shoe inserts today?                                                                  |        |         |           |          |        |          |        |
| Did you take any medication for your knee pain today?<br>If yes, please write down what you took (e.g. Panadol, Nurofen) |        |         |           |          |        |          |        |
| Is there anything else you'd like to tell us about today?                                                                |        |         |           |          |        |          |        |



## WEEK 7!

Please write Monday's date here: \_\_\_\_\_

Please record the following information each day over the week.

| Daily Record                                                                                                             | Monday | Tuesday | Wednesday | Thursday | Friday | Saturday | Sunday |
|--------------------------------------------------------------------------------------------------------------------------|--------|---------|-----------|----------|--------|----------|--------|
| What activities or sport did you do today?                                                                               |        |         |           |          |        |          |        |
| How was your knee pain today on a scale of 0-10?                                                                         |        |         |           |          |        |          |        |
| What type of shoes did you wear today? Please look at the examples on page 1.                                            |        |         |           |          |        |          |        |
| How many hours did you wear your shoe inserts today?                                                                     |        |         |           |          |        |          |        |
| Did you have any problems with your shoe inserts today?                                                                  |        |         |           |          |        |          |        |
| Did you take any medication for your knee pain today?<br>If yes, please write down what you took (e.g. Panadol, Nurofen) |        |         |           |          |        |          |        |
| Is there anything else you'd like to tell us about today?                                                                |        |         |           |          |        |          |        |





## WEEK 8!

Please write Monday's date here: \_\_\_\_\_

Please record the following information each day over the week.

| Daily Record                                                                                                             | Monday | Tuesday | Wednesday | Thursday | Friday | Saturday | Sunday |
|--------------------------------------------------------------------------------------------------------------------------|--------|---------|-----------|----------|--------|----------|--------|
| What activities or sport did you do today?                                                                               |        |         |           |          |        |          |        |
| How was your knee pain today on a scale of 0-10?                                                                         |        |         |           |          |        |          |        |
| What type of shoes did you wear today? Please look at the examples on page 1.                                            |        |         |           |          |        |          |        |
| How many hours did you wear your shoe inserts today?                                                                     |        |         |           |          |        |          |        |
| Did you have any problems with your shoe inserts today?                                                                  |        |         |           |          |        |          |        |
| Did you take any medication for your knee pain today?<br>If yes, please write down what you took (e.g. Panadol, Nurofen) |        |         |           |          |        |          |        |
| Is there anything else you'd like to tell us about today?                                                                |        |         |           |          |        |          |        |



## WEEK 9!

Please write Monday's date here: \_\_\_\_\_

Please record the following information each day over the week.

| Daily Record                                                                                                             | Monday | Tuesday | Wednesday | Thursday | Friday | Saturday | Sunday |
|--------------------------------------------------------------------------------------------------------------------------|--------|---------|-----------|----------|--------|----------|--------|
| What activities or sport did you do today?                                                                               |        |         |           |          |        |          |        |
| How was your knee pain today on a scale of 0-10?                                                                         |        |         |           |          |        |          |        |
| What type of shoes did you wear today? Please look at the examples on page 1.                                            |        |         |           |          |        |          |        |
| How many hours did you wear your shoe inserts today?                                                                     |        |         |           |          |        |          |        |
| Did you have any problems with your shoe inserts today?                                                                  |        |         |           |          |        |          |        |
| Did you take any medication for your knee pain today?<br>If yes, please write down what you took (e.g. Panadol, Nurofen) |        |         |           |          |        |          |        |
| Is there anything else you'd like to tell us about today?                                                                |        |         |           |          |        |          |        |



## WEEK 10!

Please write Monday's date here: \_\_\_\_\_

Please record the following information each day over the week.

| Daily Record                                                                                                             | Monday | Tuesday | Wednesday | Thursday | Friday | Saturday | Sunday |
|--------------------------------------------------------------------------------------------------------------------------|--------|---------|-----------|----------|--------|----------|--------|
| What activities or sport did you do today?                                                                               |        |         |           |          |        |          |        |
| How was your knee pain today on a scale of 0-10?                                                                         |        |         |           |          |        |          |        |
| What type of shoes did you wear today? Please look at the examples on page 1.                                            |        |         |           |          |        |          |        |
| How many hours did you wear your shoe inserts today?                                                                     |        |         |           |          |        |          |        |
| Did you have any problems with your shoe inserts today?                                                                  |        |         |           |          |        |          |        |
| Did you take any medication for your knee pain today?<br>If yes, please write down what you took (e.g. Panadol, Nurofen) |        |         |           |          |        |          |        |
| Is there anything else you'd like to tell us about today?                                                                |        |         |           |          |        |          |        |



## WEEK 11!

Please write Monday's date here: \_\_\_\_\_

Please record the following information each day over the week.

| Daily Record                                                                                                             | Monday | Tuesday | Wednesday | Thursday | Friday | Saturday | Sunday |
|--------------------------------------------------------------------------------------------------------------------------|--------|---------|-----------|----------|--------|----------|--------|
| What activities or sport did you do today?                                                                               |        |         |           |          |        |          |        |
| How was your knee pain today on a scale of 0-10?                                                                         |        |         |           |          |        |          |        |
| What type of shoes did you wear today? Please look at the examples on page 1.                                            |        |         |           |          |        |          |        |
| How many hours did you wear your shoe inserts today?                                                                     |        |         |           |          |        |          |        |
| Did you have any problems with your shoe inserts today?                                                                  |        |         |           |          |        |          |        |
| Did you take any medication for your knee pain today?<br>If yes, please write down what you took (e.g. Panadol, Nurofen) |        |         |           |          |        |          |        |
| Is there anything else you'd like to tell us about today?                                                                |        |         |           |          |        |          |        |



## WEEK 12!

Please write Monday's date here: \_\_\_\_\_

Please record the following information each day over the week.

| Daily Record                                                                                                             | Monday | Tuesday | Wednesday | Thursday | Friday | Saturday | Sunday |
|--------------------------------------------------------------------------------------------------------------------------|--------|---------|-----------|----------|--------|----------|--------|
| What activities or sport did you do today?                                                                               |        |         |           |          |        |          |        |
| How was your knee pain today on a scale of 0-10?                                                                         |        |         |           |          |        |          |        |
| What type of shoes did you wear today? Please look at the examples on page 1.                                            |        |         |           |          |        |          |        |
| How many hours did you wear your shoe inserts today?                                                                     |        |         |           |          |        |          |        |
| Did you have any problems with your shoe inserts today?                                                                  |        |         |           |          |        |          |        |
| Did you take any medication for your knee pain today?<br>If yes, please write down what you took (e.g. Panadol, Nurofen) |        |         |           |          |        |          |        |
| Is there anything else you'd like to tell us about today?                                                                |        |         |           |          |        |          |        |

Please write any other comments here:

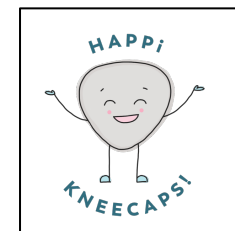

Supplement: MOESM2 [file 18240664]
